# Supplementary material for: IL-6 Regulates Hepcidin Expression Via the BMP/SMAD Pathway by Altering BMP6, TMPRSS6 and TfR2 Expressions at Normal and Inflammatory Conditions in BV2 Microglia
Source: PubMed Central journal article supplement (PMC8053173; doi:10.1007/s11064-021-03322-0), 2021-04-09

Figure 3AB

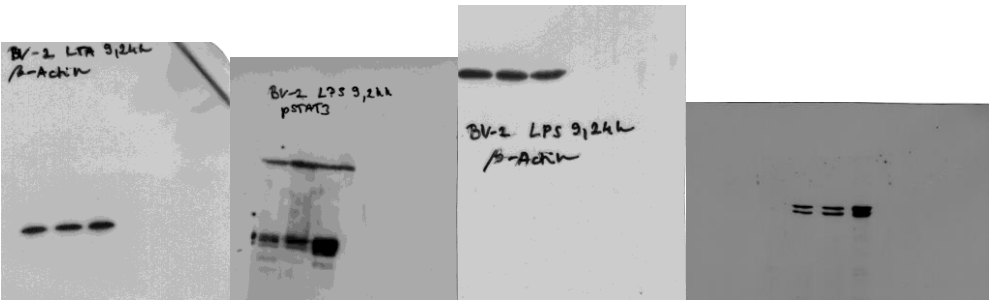

Figure 5A

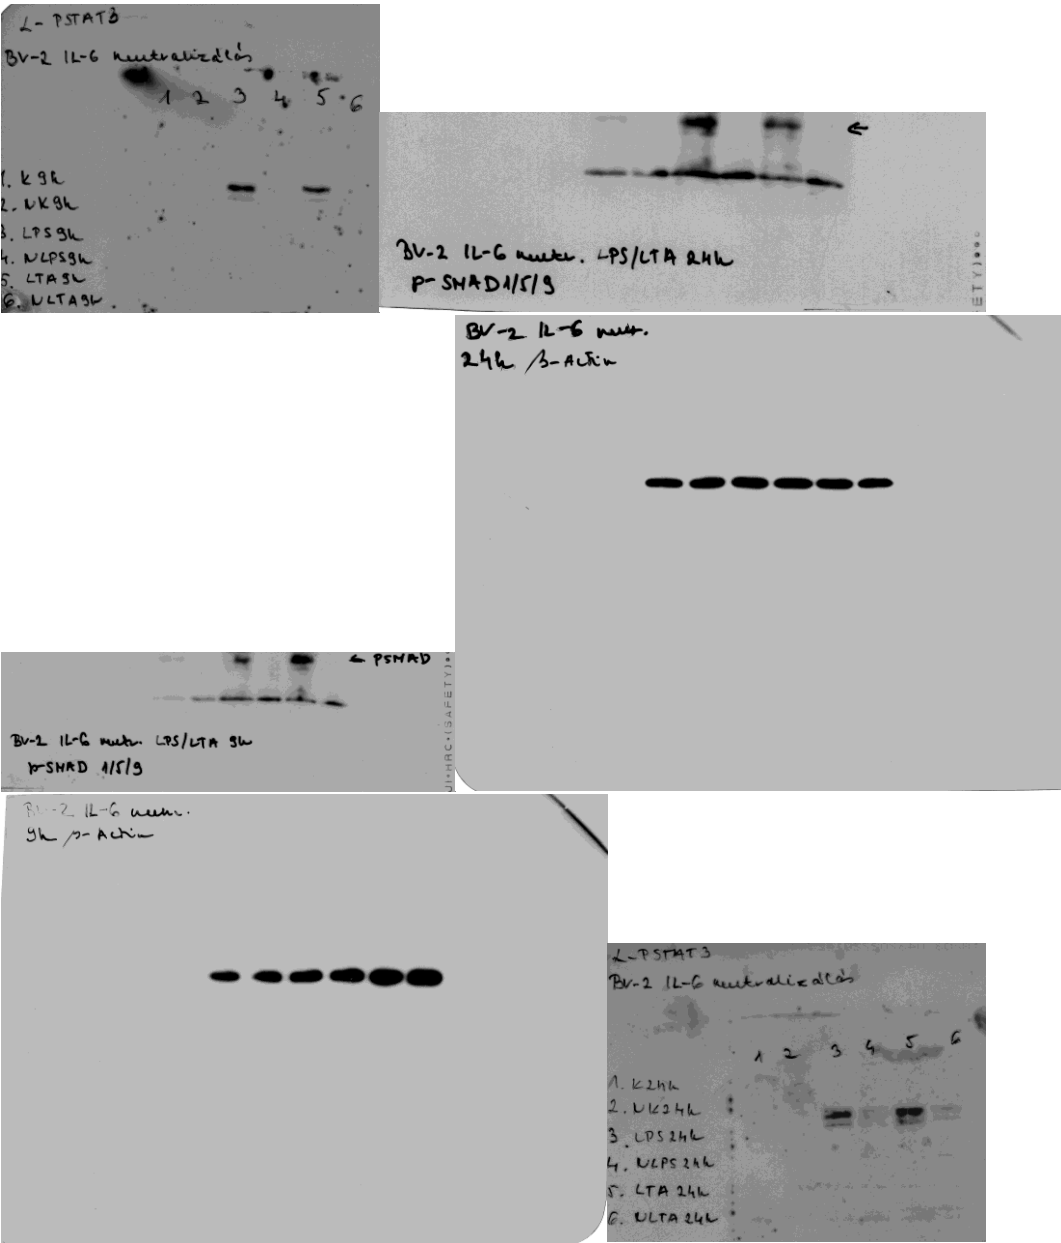

Figure 8A

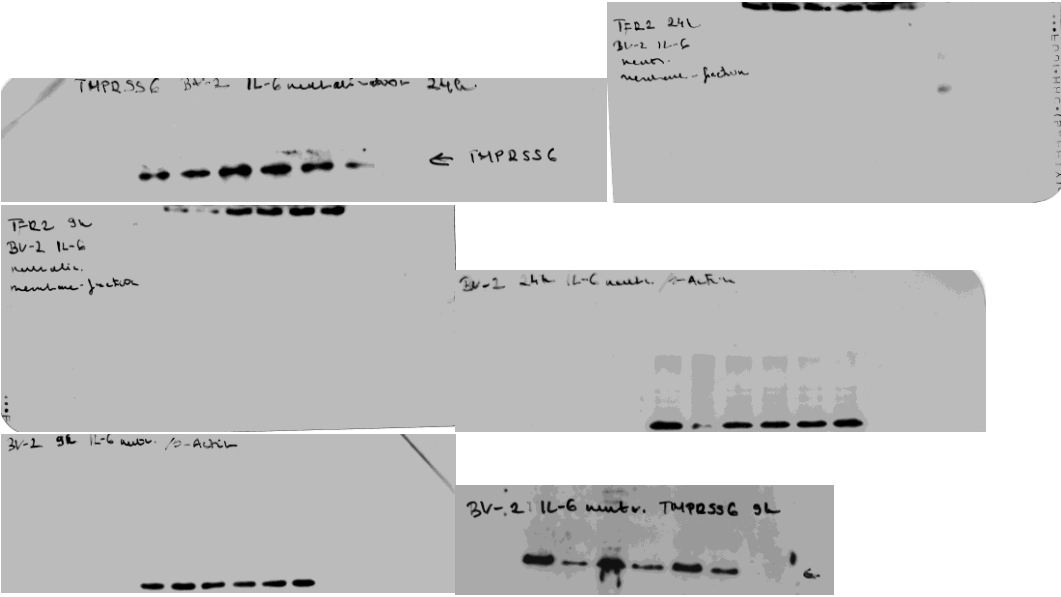

Figure 9A

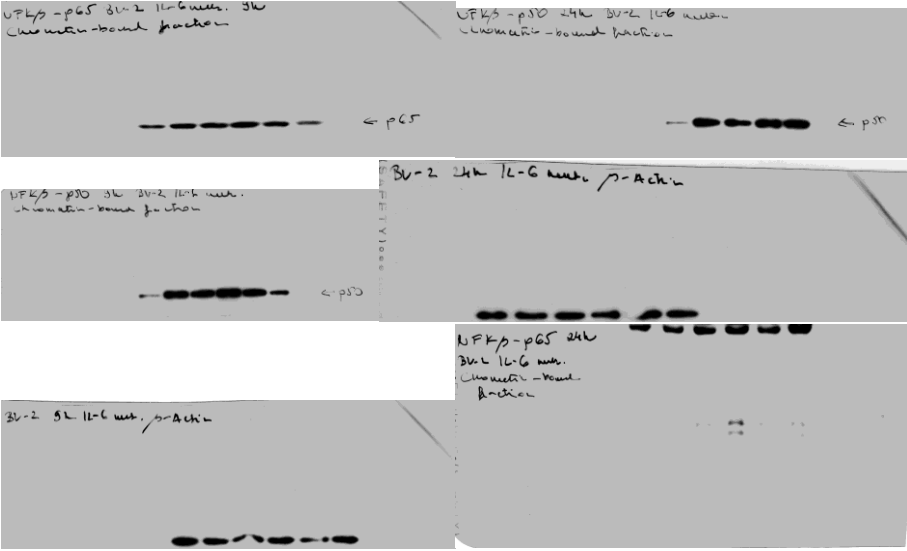

Supplement: 11064_2021_3322_MOESM2_ESM.pdf [file 11064_2021_3322_MOESM2_ESM.pdf]
